# Supplementary material for: Rapid growth of onion-like carbon nanospheres in a microwave oven
Source: Royal Society of Chemistry journal article supplement (doi:10.1039/c5ce01785h), 2015-11-13
Supplement: c5ce01785h1.pdf [file c5ce01785h1.pdf]

## Supplementary information

### Rapid growth of onion-like carbon nanospheres in a microwave oven

ReetiBajpai<sup>a</sup>, LevRapoport<sup>b</sup>, KobiAmsalem<sup>c</sup>, Hanoch Daniel Wagner <sup>\*a</sup>,

<sup>a</sup>Department of Materials and Interfaces, Weizmann Institute of Science, Rehovot 7610001, Israel,  
Email: [daniel.wagner@weizmann.ac.il](mailto:daniel.wagner@weizmann.ac.il), Tel: +972-8-934-2594

<sup>b</sup>Holon Institute of Technology, Department of Science, Holon 5810201, Israel

<sup>c</sup>Rafael Advanced Defense Systems Ltd., Haifa 3102102, Israel

#### S1. Effect of microwave heating on precursor graphite (without naphthalene)

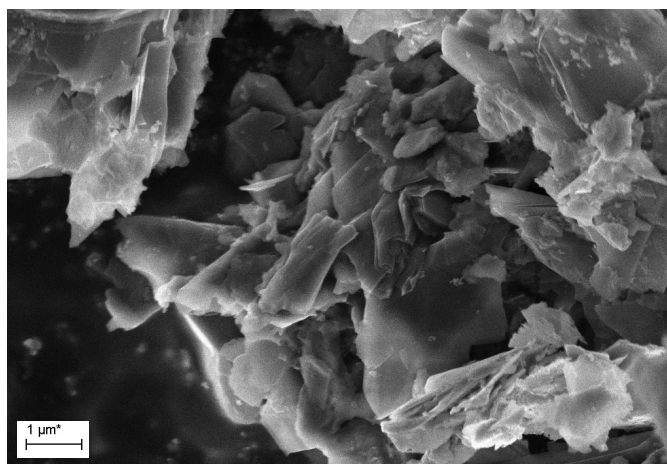

Fig.S1. Precursor graphite powder showing no visible difference in its planar morphology after heating it in microwave oven for 1 min under atmospheric conditions.

## S2.Coalescence of OLCS particles

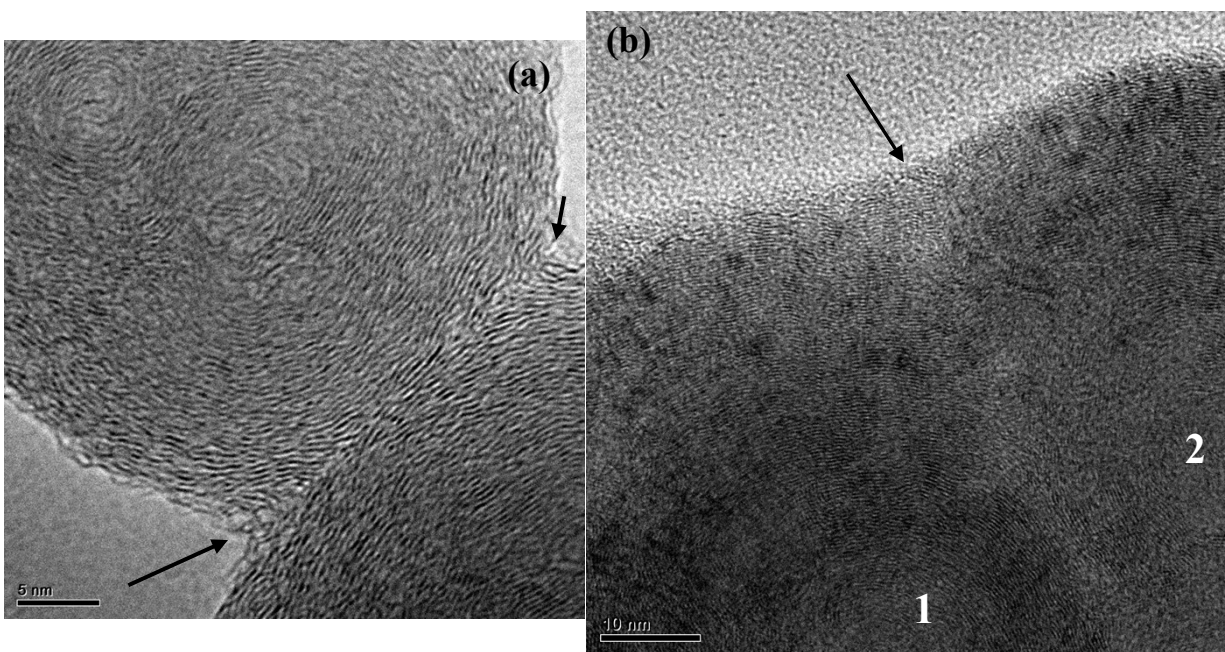

Fig. S2. TEM images demonstrate the attachment of two different OLCS particles by joining of the outer graphitic walls (indicated by arrows).

**S3. Core shell nanoparticles having different crystal structures in their core.**

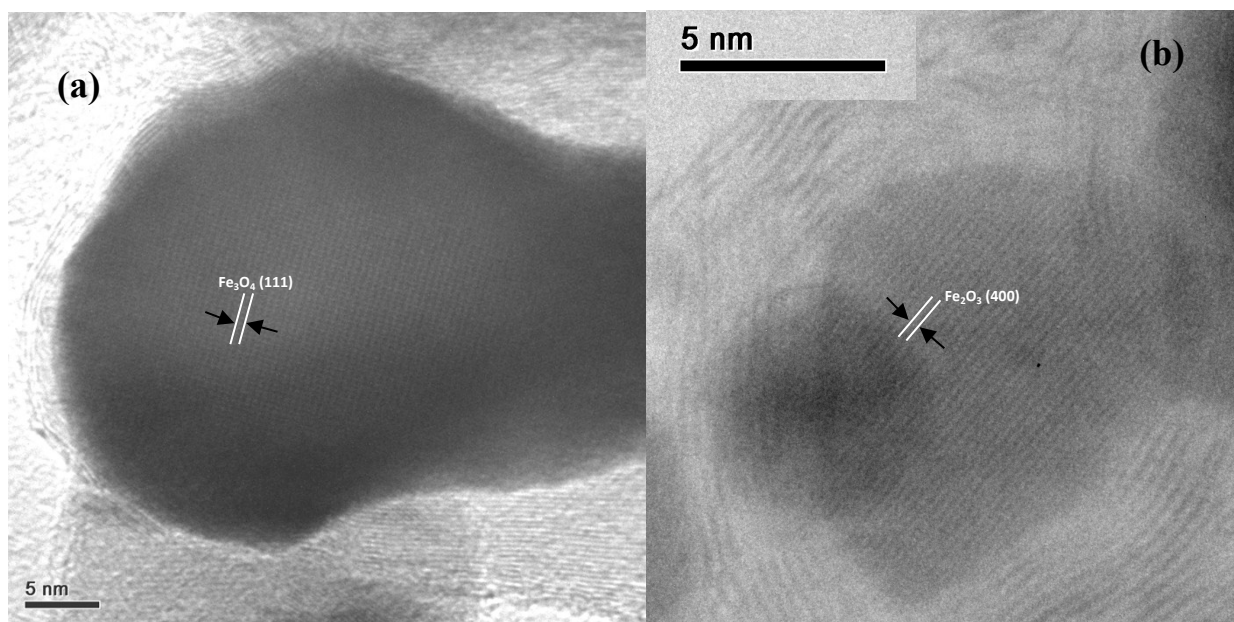

Fig. S3. TEM images of the core-shell nanoparticles formed by the microwave irradiation of ferrocene mixed with naphthalene and graphite. Crystal planes of the core particle with different interplanar spacing that match closely with (a)  $\text{Fe}_3\text{O}_4$  and (b)  $\text{Fe}_2\text{O}_3$  is shown in the magnified TEM images.
